# Emergent periodicity in the collective synchronous flashing of fireflies

Raphaël Sarfati<sup>1,†</sup>, Kunaal Joshi<sup>2,†</sup>, Owen Martin<sup>1,†</sup>, Julie C. Hayes<sup>3</sup>  
 Srividya Iyer-Biswas<sup>2,4\*</sup>, Orit Peleg<sup>1,4\*</sup>

<sup>1</sup>BioFrontiers Institute, University of Colorado Boulder, Boulder, CO, USA, <sup>2</sup>Department of Physics and Astronomy, Purdue University, West Lafayette, Indiana, USA, <sup>3</sup>Department of Computer Science, University of New Mexico, Albuquerque, NM, USA, <sup>4</sup>Santa Fe Institute, Santa Fe, NM 87501, USA.

<sup>†</sup>These authors contributed equally

\*Correspondence: [iyerbiswas@purdue.edu](mailto:iyerbiswas@purdue.edu), [orit.peleg@colorado.edu](mailto:orit.peleg@colorado.edu)

## Abstract

Left alone, *Photinus carolinus* fireflies flash without an intrinsic period, making it uncertain when they may flash next. Yet when gathering at the mating lek in large swarms, these fireflies transition into predictability, synchronizing with their neighbors with a rhythmic periodicity. Here we propose a mechanism for emergence of synchrony and periodicity, and formulate the principle in a mathematical framework. Remarkably, with no fitting parameters, analytic predictions from this simple principle and framework agree strikingly well with data. Next, we add further sophistication to the framework using a computational model featuring groups of random oscillators via integrate-and-fire interactions controlled by a tunable parameter. This agent-based model of *P. carolinus* fireflies interacting in swarms of increasing density also shows quantitatively similar phenomenology and reduces to the analytic framework in the appropriate limit of the tunable parameter. We discuss our findings and note that the resulting dynamics follow the style of a decentralized follow-the-leader synchronization, where any of the randomly flashing individuals may take the role of the leader of any subsequent synchronized flash burst.

## 1 Introduction

Physical systems consisting of several interacting entities often exhibit large-scale properties which are distinct from the capabilities of each entity taken individually: this is the well-known concept of emergence. Emergence has been observed and studied in both inanimate and animate systems, including famously groups of animals [1, 2]. Animal collective behavior broadly designates dynamical patterns that are unsupervised consequences of the accumulation of low-level interactions between neighboring individuals [3, 4, 5]. One simple yet compelling manifestation of emergence in the natural world is in the form of firefly flash synchronization [6, 7, 8, 9, 10]. For example, when sufficiently many *Photinus carolinus* fireflies congregate into a mating swarm (lek), they start to align their flashes on the same tempo, creating a mesmerizing display which has captivated the curious mind of many. This serves to strengthen their species-specific signal and heighten the ability for conspecific males and females to identify one another [6, 11, 12]. In addition to collective synchrony, a more careful examination of *P. carolinus*' flashing pattern further reveals another non-trivial signature: *emergent periodicity*. Indeed, in their natural habitat, these fireflies produce periodic bursts of flashes occurring with great regularity, with a period of roughly 12s [6, 11]. Surprisingly, when put in isolation, a single firefly does not appear to show any regularity about when it emits its flash trains [8], where intervals between flash trains vary between a few seconds to a few minutes apart. How, then, can a multitude of interacting fireflies exhibit a specific frequency that does not appear to be encoded in any single one of them? This paper proposes an explanation for this emergent periodicity. Since firefly flashing is mostly guided by behavior, rather than physiology, one possible explanation is that fireflies indeed “know” their collective frequency, but simply do not show it in the absence of a cooperative and responsive crowd. While this hypothesis is hard to dismiss rigorously, we will show that there exists a simple stochastic mechanism that explains the convergence towards a common, well-defined period between flash bursts as the number  $N$  of fireflies increases.

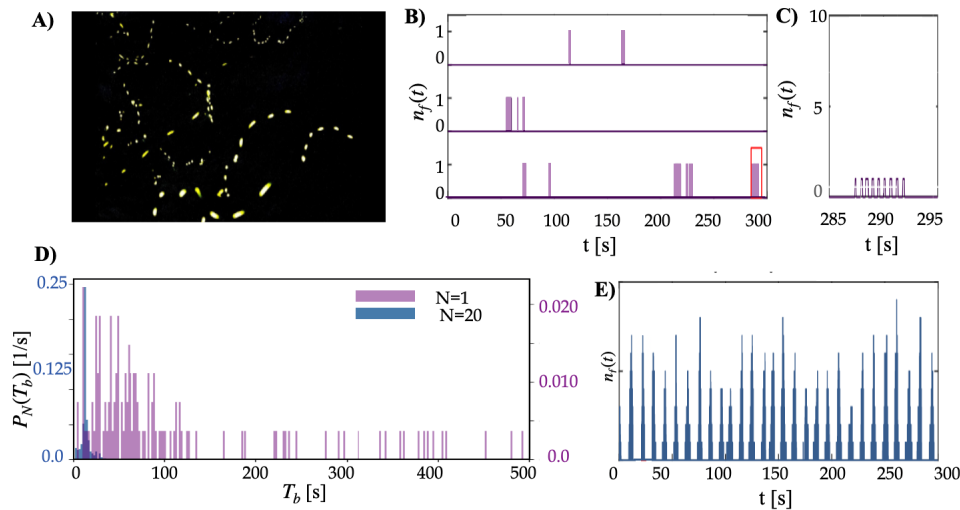

Figure 1: (A) Long exposure photograph illustrating flashes in a *P. carolinus* natural swarm. (B) Overlaid time series of three isolated individual fireflies emitting flash bursts which appear random. The inset (C) shows the burst-like nature of *P. carolinus* flash events. (D) Interburst distributions  $b(t)$  for one firefly (purple) and twenty fireflies (blue) insulated from the rest of the swarm. (E) Twenty *P. carolinus* fireflies flashing in a tent exhibiting the periodic nature of their collective flashing.

## 2 Behavioral experiments

A *P. carolinus* lek in its natural habitat contains several thousands of fireflies which display a robust collective flash pattern. They flash over the course of periodic bursts separated by a few seconds of total darkness (Fig. 1A, over a few seconds). Collective bursts in the swarm have a well-defined period (peak-to-peak) of about 12s (8). One could think, then, that each individual firefly also emits flash trains with about the same time period, and that the effect of visual interactions is to align these individual trains on the same tempo. In other words, the swarm could be a set of coupled oscillators converging to a common phase, as has been described in previous models (13; 14; 15; 16; 17). Crucially, however, when a single firefly is taken out of the lek and placed in a large ( $2\text{m}^3$ ) enclosing volume visually insulated from the rest of the group, all periodicity in the occurrence of flash trains is lost. The single firefly continues to emit sporadic bursts (Fig. 1B,C), but the time between successive flash bursts varies between a few seconds and a few minutes (Fig 1B (8)). This suggests that individual inter-burst intervals (IBI) occur at random, and may thus depend on a variety of behavioral factors. When collecting measurements from 10 different fireflies recorded for several minutes under the same conditions, we are able to outline the distribution of inter-burst intervals for a single firefly in isolation (Fig. 1D, purple). (The underlying assumption here is that all fireflies have the same distribution of inter-burst intervals). Interestingly, as the number of fireflies within the enclosing volume is increased, a regularity in the time between bursts starts to emerge. At about  $N=15$ , the distribution of inter-burst intervals becomes very similar to that observed in the natural habitat. And for  $N=20$ , it is clear that there is a very strong collective periodicity separating flash bursts of about 12s, similar to that of the undisturbed swarm flashing just outside the tent (Fig 1D,E).

## 3 Proposed principle of emergent synchrony and periodicity, and its analytic formulation

Here we propose the following paradigm, derive its mathematical formulation, and validate its predictions against experimental data: (1) Each time a firefly has finished flashing, it waits a random time  $t$ , drawn from a distribution  $b(t)$  which is identical for all individuals, before flashing again. (2) Upon flashing, a firefly

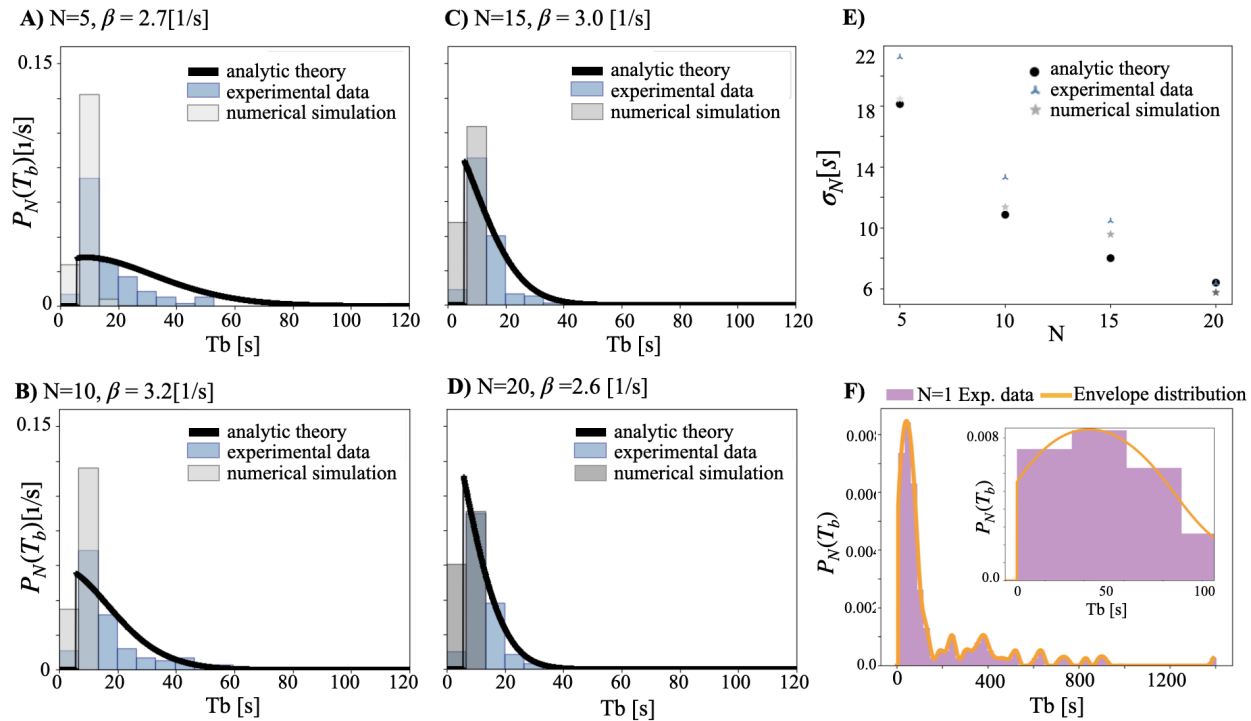

Figure 2: Experimental data vis-a-vis results from analytic theory (no fitting parameters) and computational model (wherein  $\beta$  is a fitting parameter as explained in accompanying text). (A-D) show the interburst distributions for different numbers of fireflies. The  $\beta$  value atop each figure corresponds with the  $\beta$  value at which the transition to periodicity becomes stable for each  $N$  (see Fig. 3). Plot (E) demonstrates that the standard deviation of the inter-burst interval distribution indeed decreases with  $N$  as predicted by analytic theory (no fitting parameter; see theory section) and the computational model (using the respective value of best-fit  $\beta$  shown with the corresponding distribution in Panels (A-D)). Plot (F) shows the input distribution obtained from experiments used for the analytical theory and, in conjunction with  $\beta$  values, for the computational model. Plot (F) is obtained from experimental observations of one firefly (Fig. 1D, purple, represented here also in purple). The orange curve shows an envelope distribution over the input data from which theory and simulations are instantiated (detailed methods outlined in the SI).

stimulates all other fireflies to also flash. (3) After flashing, each firefly resets its internal waiting time to another random  $t$ .

We denote by  $T_b$  the *collective* interburst interval, that is the time between any two successive flashes produced in the swarm. The probability  $Q$  that  $T_b$  is larger than some time  $T^*$  equals the probability that no firefly has flashed before  $T^*$ , *i.e.*

$$Q(T_b \geq T^*) = [q(t \geq T^*)]^N = [1 - c(T^*)]^N, \quad (1)$$

where  $c(t)$  is the cumulative probability corresponding to  $b(t)$ , since all fireflies are independent until the moment they flash. The corresponding probability density function follows directly as:

$$P_N(T_b) = N \left[ \int_{T_b}^{\infty} b(t) dt \right]^{N-1} b(T_b). \quad (2)$$

Thus we have set up a mathematical framework which takes as its input the experimentally observed interburst distribution, and makes specific predictions with no fine-tuning fitting parameters.

If there exists a minimal time  $T_0$  such that  $b(t) = 0$  for all  $t < T_0$ , and  $b(T_0 + \epsilon) > 0$  for arbitrarily small positive values of  $\epsilon$ , then  $P_N(T_b < T_0) = 0$  and  $P_N(T_b > T_0)$  vanishes for large  $N$  (since the integral is smaller than 1). Therefore, the distribution converges towards a single possible value,  $T_b = T_0$  for large  $N$ .

These predictions are consistent with the intuitive result that the shortest possible interburst interval is the only one that occurs in large, fully-connected, and instantaneously-stimulated groups of fireflies. We expect such a threshold minimum time to exist owing to physiological constraints, which prevent the fireflies from flashing continuously forever without pause. Intuitively, as the number of fireflies increases, there is a greater probability that at least one of those fireflies will flash at an interval close to the minimum.

Conceptually, in the idealization that at  $N \rightarrow \infty$  this distribution converges to a Dirac delta function, which tends to make the flashing patterns perfectly periodic with no variation (see SI). However, for a finite number  $N$  of fireflies, the distribution peaks at a value greater than  $T_0$ , and has a specific non-zero width with decreases with increasing  $N$  (see SI). These specific predictions are spectacularly borne out by the experimental data. With no fine-tuning fitting parameter, and the experimentally observed single firefly distribution (Fig. 2F) as the only input to the mathematical framework, we see an excellent match between the  $N$ -dependent experimentally observed interburst distributions and the corresponding prediction from analytic theory (Figs. 2A-D). Moreover, the corresponding sharpening of the peak of the distribution (resulting in decreasing noise) with increasing  $N$  also quantitatively matches with the trend predicted by theory — see the plot of standard deviation vs.  $N$  in panel Fig. 2E). Through these compelling matches between predictions from the theory, sans fitting parameters, and the experimental observations, we establish the validity of the proposed principle for emergent synchrony and periodicity.

Furthermore, using the analytic framework the following rigorous results can be generally proved to hold for *any* input single firefly distribution: As the number  $N$  of fireflies increases, along with the variance, *all* the moments the interburst distribution monotonically decrease. In addition, the left-most mode shifts further towards the left with increasing  $N$  until it reaches  $T_0$ . Taken together, what these predictions show is that for any input distribution shape, we are guaranteed to get emergent periodicity and synchrony through the proposed mechanism. We have provided detailed derivations of these predictions in the supplementary section.

## 4 Computational Model

The theoretical formulation in the preceding section is built on the assumption that all fireflies immediately start flashing upon seeing any other one flash, but in practice there could be some time delay or imperfect information transfer, which could be made shorter if the firefly sees additional fireflies flashing too. The rate at which this delay is shortened in proportion to the number of flashing fireflies is given by the behavioral coupling between the fireflies, labeled  $\beta$ . When  $\beta \rightarrow \infty$ , this limit represents the idealization derived in the theory section: the strongly correlated limit, wherein a single firefly's flashing is sufficient to immediately stimulate all others to also start flashing, while  $\beta = 0$  represents completely non-interacting fireflies.

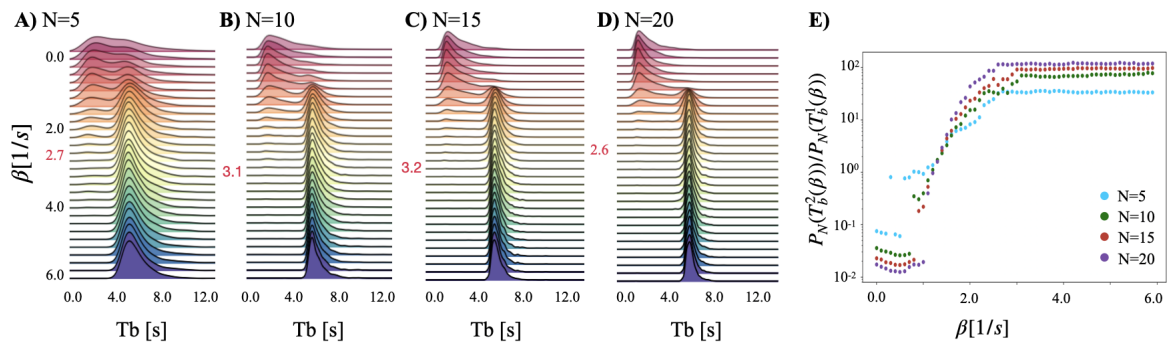

Figure 3: (A-D) Visual demonstration of the emergence of periodicity above  $T_{b0}$  as  $\beta$  ranges between 0-6 for each value of  $N$ . The beta value at which the periodicity stabilizes is shown in red. (E) The ratio of the height of  $T_b^2$  divided by the height of  $T_b^1$ , or as the vertical axis label calls it,  $P_N(T_b^2(\beta))/P_N(T_b^1(\beta))$ . Peaks with a height less than  $y_\epsilon = 0.01$  are replaced with  $y_\epsilon$  to avoid zero-divide and divide-by-zero problems.  $T_{b1}$  is defined as any peak with a value less than 3.5s seconds, which can otherwise be interpreted as the "noisy" regime.  $T_{b2}$  is defined as any peak with a value greater than 3.5s seconds, otherwise known as the "periodic" regime. The transition between the two regimes generally appears around  $\beta = 1.0$  and stabilizes around  $\beta = 2.7$  (see Fig S6).

## 4.1 Formulation

We propose a simple numerical simulations based on the mechanism previously described. Following previous computational models [18, 19, 20], we implement a group of  $N$  fireflies whose flashing dynamics is governed by charging and discharging processes which represent the time between two flashes and the duration of a flash, respectively. These processes are determined by both an agent's internal characteristics and its interactions with the group. Specifically, the internal state of firefly  $i$  is characterized by variables  $V$  and  $\epsilon$  whose evolution follows:

$$\frac{dV_i(t)}{dt} = \frac{1}{T_{si}}\epsilon_i(t) - \frac{1}{T_{di}}[1 - \epsilon_i(t)] + \sum_{i,j} \beta_{ij}\delta_{ij}[1 - \epsilon_j(t)], \quad (3)$$

which is a standard equation for the integrate-and-fire (IF) scheme. The firefly flashes and sets  $\epsilon_i = 1$  when  $V = 1$  for a duration  $T_{di}$ , and is dark while charging ( $\epsilon_i = 0$ ) for time  $T_{si} = T_{bi} - T_{di}$ , where  $T_{bi}$  represents the start-to-start inter-flash interval for firefly  $i$ , drawn directly from the input distribution envelope in Fig. 2F. However, the firefly may be "pulled" faster towards flashing if neighboring fireflies are flashing as well, which is represented by the third term, where  $\delta_{ij} = \{0, 1\}$  represents connectivity and  $\beta_{ij}$  is the coupling strength. For simplicity, here we use all-to-all connectivity ( $\delta_{ij} = 1, \forall(i, j)$ ) and vary the common interaction  $\beta_{ij} = \frac{\beta}{N}$ . The crucial difference with prior IF implementations is that  $T_b$  is a random variable whose value is drawn from our experimental distributions of interburst intervals (see Fig. S4) and resets, for each agent, every time they individually switch state. In this stochastic IF model the variability between flashes is accounted for, while maintaining the overall structure of the IF model.

## 4.2 Transition to Periodicity

This model exhibits a transition to group periodicity as interactions between agents are increased. We define the *group* interburst interval as the time between one flash and the next flash produced by *any* other firefly in the swarm. For example, consider the case of  $N = 20$  (Fig. 3D). When  $\beta = 0$  each firefly behaves purely individually and interburst intervals tend to aggregate towards small values due to the random unsynchronized flashing of the  $N$  fireflies each with a flashing behavior typical of isolated individuals. This remains the case until the coupling strength,  $\beta$ , becomes large enough that there is enough

of collective entrainment to align the flashes of the group. This phenomenon starts emerging around  $\beta = 1$ , and strengthens until a plateau at stable periodicity where  $\beta \approx 2.7$ . In these regimes, when one firefly flashes it quickly triggers all others. All agents then reset their charging time at roughly the same moment, and the smallest  $T_b$  defines the duration between this flash and the next. As a consequence, interburst intervals of the collective,  $T_b$ , shift to a larger value corresponding to the smallest time between flashes for an individual firefly ( $t_{b0}$ ). We quantify this transition by examining the characteristic peaks in the  $T_b$  distribution: a peak that occurs before the transition marked at  $T_b^1$  with corresponding probability  $P(T_b^1)$ , and similarly, a peak occurring after the transition marked at  $T_b^2$  with corresponding probability  $P(T_b^2)$ . The ratio of these probabilities,  $P(T_b^2)/P(T_b^1)$  is low before the transition, and experiences a sharp increase at  $\beta = 1$  (Fig. 3E). See SI Section 8.3.2 for full definitions. The high-coupling peak is also naturally sharper at increasing  $N$ : at larger  $N$ , the probability that some  $T_{c,i}$  approaches the minimum possible  $T_b$  is higher, resulting in more regularity the collective flashing pattern (Fig. 2F, and Fig. S5).

As our model has a single open parameter, namely the coupling strength  $\beta$ , we conduct a detailed comparison of the model and experimental data to infer the most likely value of  $\beta$  for the firefly system. A systematic parameter sweep over the values of  $\beta$  and  $N$  provide a set of  $T_b$  interval distributions. We use the slope of the relationship between  $P(T_b^2)$  and  $P(T_b^1)$  to identify the beta value at which the system stabilizes to emergent periodicity (Fig. 3E and Fig. S5). These chosen  $\beta$  values are indicated in red on Fig. 3A-D, and their corresponding  $T_b$  distributions are shown in Fig. 2A-D.

## 5 Discussion and concluding remarks

In this work, we have proposed a synchronization mechanism that produces emergent periodicity and demonstrated its remarkable quantitative applicability to the synchronous periodic flashing of fireflies as observed in natural settings. In systems following our principle, individuals may behave erratically without any periodicity in their behavior, yet when brought together as a collective, their behavioral patterns become highly synchronized and periodic. Moreover, this effect increases with the number of fireflies present through a simple and intuitive behavioral pattern. Using this principle, we successfully predict the qualitative sharpening of the peak of the distribution of interval between flashes by simply using the interval between flashes of isolated individual fireflies and without requiring any fitting parameter. Further, our computational model quantitatively builds on the predictions of the theory by letting the strength of coupling between fireflies vary and provides added insights.

Specifically, we have shown that the simple behavioral model presented in this paper successfully reproduces the experimental distributions of inter-burst intervals for groups of  $N$  fireflies (Figure 2, A-D). All the input parameters for the model come directly from experimental results in Ref. [8] and subsequent unpublished field season results from the Great Smoky Mountains: the wide distribution of inter-burst intervals for single isolated fireflies, the two model timescales of charging time and discharging time are both data-driven from Ref. [8]. To demonstrate the simplicity of the model dynamics, we simulate bursts of only one flash in length. The only fitted parameter for the model is the coupling strength  $\beta$ , which demonstrates a transition in the dynamics of the model where  $\beta > 1.0$  (Fig. [3]).

If the number of fireflies increases indefinitely, or if there are visual obstacles in the environment, the assumption that each firefly can practically immediately perceive when another firefly starts flashing will no longer hold. In this case, a finite time delay in perceiving the onset of the flashing could lead to an inter-burst interval that is greater than what is expected for the ideal case. The resulting inter-burst interval distribution will consequently be shifted to the right compared to the distribution given by Eq. [2].

While the general ideas underlying the theory framework will continue to hold, the mathematical formulation will need more sophistication to take these subtler effects into account. Existing mathematical models designed for emergent synchronization of individual oscillators could be extended to account for individual variability in the period of individuals. For example, the emergent periodicity predicted for the Kuramoto model converge on the mean frequency of isolated agents [21], and the dynamical quorum sensing converge on the low frequencies of the isolated agents [22]. However, the fireflies converge on the highest frequency in the repertoire of isolated individual fireflies. While individual behavior may appear as extremely complex, collective behavior based on simple and credible behavioral rules converges towards a simple emergent phenomenon as we have demonstrated. This wait-and-start phenomenon might be observable in different



biological systems as well.

The mathematical implementation of the proposed paradigm results in an interburst interval distribution which converges towards a unique possible value corresponding to the lower bound of the individual IB distribution, at increasing  $N$ . That means that in the limit of an infinitely large and entirely connected swarm, the smallest IBI always occurs. This is at odds with two empirical observations: 1) while most of the smallest IBI from an isolated firefly peak at 12s and more, there are some residual value between 5s and 12s; 2) natural swarms comprising thousands of fireflies do not exhibit a 5s period. We propose some explanation to reconcile these two facts.

First, fireflies are known to produce annex flash patterns, for instance for alarm, in addition to the primary courtship phrase. It is possible that isolated fireflies in a confining volume switch to different behavioral modes that produce atypical flash train with intervals less than what they would typically do in an unobstructed environment with responding peers. Secondly, it is possible that the swarm buffers against unusual perturbations. More than finite-size effects, the main caveat here is that the swarm is not all-to-all connected, as we showed previously (9). Therefore, the effective  $N$  would be much smaller than the swarm size, and correspond more appropriately to the number of active fireflies in each other's field-of-view. As a consequence, the mode of the distribution would remain centered around 12s, rather than smaller value which would only occur at very large effective  $N$ .

It is easy to imagine extensions of this work that leverage the spatial positions of individuals in the model using distance- or sight-dependent coupling to modify the adjacency matrix and add further complexity to the system, and this framework makes implementation of this idea ripe for a future endeavor. To provide direct evidence for the underlying mechanistic principles, further experiments are needed. A promising avenue consists of artificially and controllably tuning the interactions within the group, for example, artificial flash entrainment with an LED should be able to decrease the inter burst interval.

## 6 Author contributions

R.S., J.C.H. and O. P. collected the data; R.S. analyzed the data; K.J. and S.I-B. conceptualized the theory framework and proposed the principle; K.J. and S.I-B. performed analytic calculations with contributions from R.S.; O.M., R.S. and O.P. designed the computational model with insights from K.J.; O.M. performed simulations; all authors discussed the results; R.S., K.J., O.M., S.I-B. and O.P. wrote the paper. S.I-B and O.P. supervised research.

## 7 Acknowledgments

O.P. acknowledges internal funds from the BioFrontiers Institute, and a seed grant from the Interdisciplinary Research Theme on Autonomous Systems and the University of Colorado Boulder. S.I-B. and K.J. thank the Purdue Research Foundation, the Showalter Trust, and the Ross-Lynn Fellowship award for financial support.

## References

- [1] Douglas H Kelley and Nicholas T Ouellette. Emergent dynamics of laboratory insect swarms. *Scientific reports*, 3(1):1–7, 2013.
- [2] Alessandro Attanasi, Andrea Cavagna, Lorenzo Del Castello, Irene Giardina, Stefania Melillo, Leonardo Parisi, Oliver Pohl, Bruno Rossaro, Edward Shen, Edmondo Silvestri, et al. Collective behaviour without collective order in wild swarms of midges. *PLoS computational biology*, 10(7):e1003697, 2014.
- [3] Nicholas Ouellette. A physics perspective on collective animal behavior. *Physical Biology*, 2022.
- [4] M. Ballerini, N. Cabibbo, R. Candelier, A. Cavagna, E. Cisbani, I. Giardina, V. Lecomte, A. Orlandi, G. Parisi, A. Procaccini, M. Viale, and V. Zdravkovic. Interaction ruling animal collective behavior depends on topological rather than metric distance: Evidence from a field study. *Proceedings of the National Academy of Sciences of the United States of America*, 105, 2008.
- [5] Iain D. Couzin. Collective cognition in animal groups, 1 2009.

- [6] Lynn Frierson Faust. Natural history and flash repertoire of the synchronous firefly photinus carolinus (coleoptera: Lampyridae) in the great smoky mountains national park. *Florida Entomologist*, 93, 2010.
- [7] John Buck and Elisabeth Buck. Biology of synchronous flashing of fireflies. *Nature*, 211, 1966.
- [8] Raphaël Sarfati, Julie Hayes, Élie Sarfati, and Orit Peleg. Spatiotemporal reconstruction of emergent flash synchronization in firefly swarms via stereoscopic 360-degree cameras. *Royal Society Interface*, 2020.
- [9] Raphaël Sarfati, Julie C. Hayes, and Orit Peleg. Self-organization in natural swarms of photinus carolinus synchronous fireflies. *Science Advances*, 7(28), 2021.
- [10] Raphaël Sarfati, Laura Gaudette, Joseph Cicero, and Orit Peleg. Statistical analysis reveals the onset of synchrony in sparse swarms of photinus knulli fireflies. *bioRxiv*, 2022.
- [11] Andrew Moiseff and Jonathan Copeland. Firefly synchrony: A behavioral strategy to minimize visual clutter. *Science*, 329(5988):181–181, 2010.
- [12] Kathrin F. Stanger-Hall and James E. Lloyd. Flash signal evolution in photinus fireflies: Character displacement and signal exploitation in a visual communication system. *Evolution*, 69:666–682, 3 2015.
- [13] Renato E Mirolo and Steven H Strogatz. Synchronization of pulse-coupled biological oscillators. *SIAM Journal on Applied Mathematics*, 50:1645–1662, 1990.
- [14] S. H. Strogatz. Spontaneous synchronization in nature. In *Proceedings of International Frequency Control Symposium*, pages 2–4, 1997.
- [15] Steven H. Strogatz. From kuramoto to crawford: Exploring the onset of synchronization in populations of coupled oscillators. *Physica D: Nonlinear Phenomena*, 143, 2000.
- [16] B. Ermentrout. An adaptive model for synchrony in the firefly pteroptyx malaccae. *Journal of Mathematical Biology*, 29, 1991.
- [17] Francisco A. Rodrigues, Thomas K.D.M. Peron, Peng Ji, and Jürgen Kurths. The kuramoto model in complex networks. *Physics Reports*, 610, 2016.
- [18] G. M. Ramírez Vila, J. L. Deneubourg, J. L. Guisset, N. Wessel, and J. Kurths. Firefly courtship as the basis of the synchronization-response principle. *EPL*, 94, 6 2011.
- [19] Gonzalo Marcelo Ramírez Ávila, Jean-Louis Guisset, and Jean-Louis Deneubourg. Synchronization in light-controlled oscillators. *Physica D: Nonlinear Phenomena*, 182, 2003.
- [20] Gonzalo Marcelo Ramírez Ávila, Juergen Kurths, Stéphanie Depickère, and Jean-Louis Deneubourg. *Modeling Fireflies Synchronization*. Springer International Publishing, 01 2019.
- [21] Silvia De Monte, Francesco D’Ovidio, Sune Danø, and Preben Graae Sørensen. Dynamical quorum sensing: Population density encoded in cellular dynamics. *Proceedings of the National Academy of Sciences of the United States of America*, 104, 2007.
- [22] Annette F. Taylor, Mark R. Tinsley, Fang Wang, Zhaoyang Huang, and Kenneth Showalter. Dynamical quorum sensing and synchronization in large populations of chemical oscillators. *Science*, 323(5914):614–617, 2009.



## 8 Supplementary material

### 8.1 Experimental Data

The individual and collective flashing of *P. carolinus* fireflies was recorded during 10 nights of field experiments in June 2020 in Great Smoky Mountains National Park (Tennessee, USA). The experimental protocol had been developed and implemented the previous year [8]. In the natural swarm with hundreds to thousands of interacting fireflies, collective flashing consists of synchronous flashes every  $T_f \simeq 0.5$ s, during periodic bursts  $T_b \simeq 12$ s (Fig. 1C). However, it has been observed previously that individual fireflies in visual isolation do not exhibit burst periodicity. To characterize the onset of burst flashing, we performed experiments in a controlled environment. Fireflies were gently collected using insect nets, then placed individually in small plastic boxes, where species and sex were verified. Males were subsequently introduced into a secluded cuboid tent (approximately  $1.5 \times 2 \times 1.5$ m<sup>3</sup>) made of breathable black fabric and covered by a black plastic tarp to insure optimal visual isolation from fireflies on the outside. A GoPro Fusion 360-degree camera placed inside the tent recorded the entire volume at 30 or 60 frames-per-second (fps). Flashes were detected in video processing by intensity thresholding. Bursts were identified as (temporal) connected components of flashes less than 2s apart. Interburst intervals  $\tau_b$  were calculated as the duration between the first times of successive bursts. Tent experiments allow to observe the collective behavior of a small and known number of fireflies in interaction, while providing enough space for them to fly, hence reducing experimental artifacts from excessive confinement. We observed the flashing behavior of both individual fireflies in isolation and groups of 5, 10, 15 and 20 fireflies. We observed 7 individual fireflies alone in the tent, over durations between 30min and 90min. We observed that although these fireflies produced flash trains at a frequency of about 2Hz, the delay between successive trains was apparently randomly distributed, from a few seconds to tens of minutes. Then, we carried out 3 sets of experiments where the number of fireflies was increased to 5, then 10, then 15, then 20, each condition being maintained between 15min and 30min. As previously reported, collective burst flashing only appears at about 15 fireflies.

### 8.2 Theoretical Framework

#### 8.2.1 Derivation of mathematical formulation

The probability distribution  $P_N(T)$  of the inter-burst interval  $T$  of a group of  $N$  fireflies can be calculated as the probability distribution that one of the  $N$  flies starts flashing intrinsically at time  $T$ , while the rest  $(N - 1)$  flies haven't flashed until then. This is given by Eq. [2], which is replicated below for convenience:

$$P_N(T) = N \left[ \int_T^\infty b(t) dt \right]^{N-1} b(T). \quad (4)$$

The three successive terms on the right are, from left to right: the number of ways to choose the leader firefly:  $N$ ; the probability that the remaining  $N - 1$  fireflies have not flashed till time  $T$ , i.e., that they will flash later:  $[\int_T^\infty b(t) dt]^{N-1}$ ; and the probability density that leader firefly flashes at time  $T$ :  $b(T)$ .

#### 8.2.2 Numerical demonstration

We use numerical calculations to demonstrate how synchronised periodicity arises in an arbitrary system which follows the extreme-value statistics used in our theory. Here, we take an arbitrary probability distribution (given by  $N = 1$  label in Fig. 4) and plot the distribution of the minimum of  $N$  samples obtained from the  $N = 1$  distribution. The distributions for arbitrary  $N$  are described by Eq. 4 as derived previously. As  $N$  increases, these distributions become sharply peaked with maximum probability peaked at a value larger than the minimum of the  $N = 1$  distribution. For a system in which these quantities represent the interval between events, for large  $N$ , those events would become highly periodic as the width of the distribution narrows.

#### 8.2.3 Approach to Delta Function

We show that as the number of fireflies ( $N$ ) increases, the variance and all the moments of the interburst interval distribution decrease and the distribution eventually converges to a Dirac Delta function. From

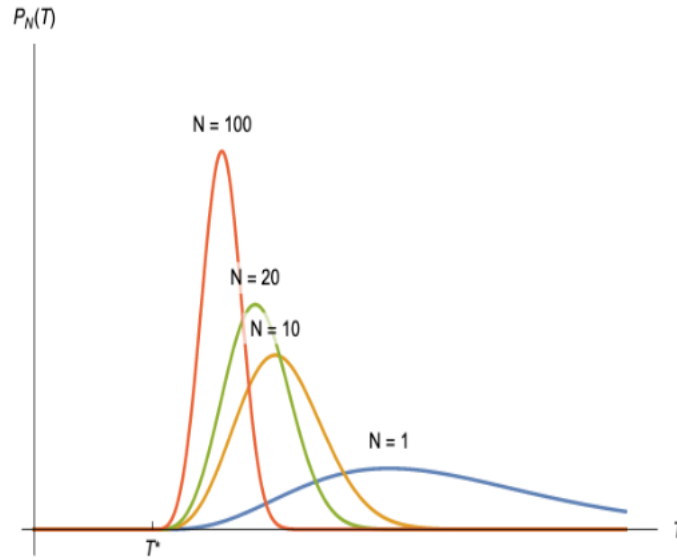

Figure 4: Demonstrating the evolution of the collective burst distribution, i.e., the distribution of time intervals between collective bursts,  $P_N(T)$ , with increasing number of fireflies,  $N$ .  $N = 1$  corresponds to the intrinsic burst distribution of a single firefly,  $b$ . Evidently, the distribution of time intervals between collective bursts becomes a sharply peaked distribution with maximum probability peaked at a value larger than  $T^*$ .

Eq. 4 the  $m^{\text{th}}$  moment for  $N$  fireflies is,

$$\langle T_N^m \rangle = N \int_0^\infty \left[ \int_t^\infty b(t') dt' \right]^{N-1} t^m b(t) dt. \quad (5)$$

Let the function  $\gamma$  be defined as,

$$\gamma(t) = \int_t^\infty b(t') dt', \quad (6)$$

thus,

$$\begin{aligned} \langle T_N^m \rangle &= -N \int_{t=0}^\infty \gamma^{N-1}(t) t^m d(\gamma(t)) \\ &= -\gamma^N(t) t^m \Big|_0^\infty + m \int_0^\infty \gamma^N(t) t^{m-1} dt. \end{aligned} \quad (7)$$

We expect the distribution of inter-burst intervals to terminate at some large value and not go on to infinity (at most, they are limited by the finite lifespan of the fireflies), thus,

$$\langle T_N^m \rangle = m \int_0^\infty \gamma^N(t) t^{m-1} dt. \quad (8)$$

Now, at any given value of  $t$ ,  $\gamma^N(t) \leq \gamma^{N-1}(t)$ . This inequality is strict whenever  $0 < \gamma(t) < 1$ . Such a region exists unless  $b(t)$  is a Dirac Delta function. If  $b(t)$  is a Dirac Delta function, then  $P_N(T_b) = b(T_b)$ . Otherwise,

$$\int_0^\infty \gamma^N(t) t^{m-1} dt < \int_0^\infty \gamma^{N-1}(t) t^{m-1} dt, \quad (9)$$

$$\Rightarrow \langle T_N^m \rangle < \langle T_{N-1}^m \rangle. \quad (10)$$

Thus, all moments strictly decrease as  $N$  increases. From Eq. 8 the variance for  $N$  fireflies is,

$$V_N = 2 \int_0^\infty \gamma^N(t) t dt - \left[ \int_0^\infty \gamma^N(t) dt \right]^2. \quad (11)$$

Writing the second term initially as a multiple integral over the entire  $t, t' > 0$  plane,

$$\left[ \int_0^\infty \gamma^N(t) dt \right]^2 = \iint \gamma^N(t) \gamma^N(t') dt dt' = 2 \iint_{t > t'} \gamma^N(t) \gamma^N(t') dt dt'. \quad (12)$$

In the preceding step we have used the symmetry of the integrand under  $t \leftrightarrow t'$ . The second term of Eq. 11 can be similarly written down:

$$2 \int_0^\infty \gamma^N(t) t dt = 2 \iint_{t > t'} \gamma^N(t) dt dt'. \quad (13)$$

Combining,

$$V_N = 2 \iint_{t > t'} \gamma^N(t) (1 - \gamma^N(t')) dt dt'. \quad (14)$$

Thus,

$$V_{N+1} - V_N = 2 \iint_{t > t'} [\gamma^{N+1}(t)(1 - \gamma^{N+1}(t')) - \gamma^N(t)(1 - \gamma^N(t'))] dt dt'. \quad (15)$$

The two  $\gamma$  functions in the above integrand satisfy:  $0 \leq \gamma(t) \leq \gamma(t') \leq 1$ , using the properties of the cumulant function. Thus,

$$\begin{aligned} \gamma(t')\gamma(t) &\leq \gamma(t), \\ \Rightarrow 1 - \gamma(t) &\geq 1 - \gamma(t)\gamma(t') \geq \gamma^N(t') [1 - \gamma(t)\gamma(t')], \\ \Rightarrow \gamma^N(t) [1 - \gamma(t)] &\geq \gamma^N(t)\gamma^N(t') [1 - \gamma(t)\gamma(t')], \\ \Rightarrow \gamma^N(t) - \gamma^{N+1}(t) &\geq \gamma^N(t)\gamma^N(t') - \gamma^{N+1}(t)\gamma^{N+1}(t'). \end{aligned} \quad (16)$$

Rearranged, this tells us that the integrand in Eq. 15 is non-positive (i.e.,  $\leq 0$ ) everywhere. Thus, we have proved that  $V_{N+1} \leq V_N$ . In other words, the variance of the flashing distribution monotonically decreases with increasing number of fireflies.

Further, as  $N \rightarrow \infty$ ,  $\gamma^N(t) \rightarrow 0$  for all  $t$  above  $T_0$  (which is the maximum value of  $t$  below which  $b(t)$  is 0). For values of  $t$  below  $T_0$ ,  $\gamma^N(t) = 1$  irrespective of  $N$ . Thus, from Eq. 8

$$\lim_{N \rightarrow \infty} \langle T_N^m \rangle = m \int_0^{T_0} t^{m-1} dt = T_0^m, \quad (17)$$

which represents moments of the Dirac Delta function  $P_{N \rightarrow \infty}(T) = \delta(T - T_0)$ . Thus, as the number of fireflies tends to infinity, the distribution of interburst intervals tends to a Dirac Delta function peaked at  $T_0$ .

## 8.2.4 Behavior of Mode

For a single firefly interburst interval distribution  $b(t)$  that is continuous for  $t \geq T_0$  and differentiable for  $t > T_0$  (where  $T_0$  is the maximum value of  $t$  below which  $b(t)$  is 0), we show that the left-most mode shifts to the left as the number of fireflies ( $N$ ) increases, unless it reaches  $T_0$ , in which case it stays at  $T_0$  on increasing  $N$ .

The mode would be the local maximum of distribution  $P_N$ . Differentiating Eq. 4

$$P'_N(t) = N\gamma^{N-2}(t) [\gamma(t)b'(t) - (N-1)b^2(t)]. \quad (18)$$

Let the left-most mode of  $P_N$  be located at  $t = t_N^*$ . If  $t_N^* = T_0$ , we have

$$\lim_{t \rightarrow T_0^+} \gamma(t)b'(t) - (N-1)b^2(t) < 0. \quad (19)$$

Now, on increasing the number of fireflies by 1, we still have

$$\lim_{t \rightarrow T_0^+} \gamma(t)b'(t) - Nb^2(t) < 0 \Rightarrow \lim_{t \rightarrow T_0^+} P'_{N+1}(t) < 0. \quad (20)$$

Thus, the mode stays at  $T_0$ . On the other hand, if  $t_N^* > T_0$ , we have,

$$\gamma(t_N^*)b'(t_N^*) - (N-1)b^2(t_N^*) = 0. \quad (21)$$

Now, on increasing the number of fireflies by 1, we get

$$\gamma(t_N^*)b'(t_N^*) - Nb^2(t_N^*) < 0 \Rightarrow P'_{N+1}(t_N^*) < 0. \quad (22)$$

Thus,  $P_{N+1}$  increases towards the left of  $t_N^*$ , i.e.,  $T_0 \leq t_{N+1}^* < t_N^*$ . Thus, the left-most mode shifts to the left as the number of fireflies ( $N$ ) increases, unless it reaches  $T_0$ , in which case it stays at  $T_0$ .

## 8.3 Agent-Based Model Implementation Details

### 8.3.1 Preparing input for the model

The input distribution for the model's inter-burst interval  $T_b$  is sampled directly from envelope distributions that encapsulate observations of one firefly's inter-burst interval. These envelope distributions were generated using an interpolating  $\beta$ -spline between bin centers of the histogram of the distribution, normalized so that the area underneath the envelope sums to 1. The protocol for generating this envelope distribution is as follows:

1. Read and clean the data
  - (a) Read the experimental observations of individual firefly  $T_b$  from an input file and save into a list called `tbs`
  - (b) Remove from `tbs` all values below 1.0s: these were deemed to be "interflash" values and should not be included
  - (c) Extract minimum value  $Tb_{min}$  and maximum value  $Tb_{max}$  from `tbs`
2. Generate the envelope
  - (a) make a histogram of the data `tbs` such that  $H(x) = y$ , defined between  $Tb_{min}$  and  $Tb_{max}$ . We used `nbins = 50`.
  - (b) calculate the interpolating beta-spline function  $H'(x)$  from  $H(x)$  that fits to the "envelope shape" of the distribution.  $H'$  is defined between  $Tb_{min}$  and  $Tb_{max}$
  - (c) Since the function  $H'(x)$  is not defined for  $x < Tb_{min}$ , we define a new function  $H''(x)$  that will be padded with 0s in the regime where  $H'(x)$  is not defined.  $H''(x)$  will span `xrange`, a list of values from 0 to  $Tb_{max}$  with 0.1s increments.
  - (d) for `x` in `xrange`: if  $Tb_{min} \leq x < Tb_{max}$ , set  $H''(x) = H'(x)$ , else  $H''(x) = 0$
  - (e) normalize  $H''(x)$  such that integrating it over `xrange` will sum to 1
  - (f) for `x` in `xrange`: write  $(x, H''(x))$  to a new file
3. Draw from the envelope
  - (a) read  $(x, H''(x))$  pairs from new file
  - (b) let  $N$  = number of input values to choose
  - (c) randomly sample  $N$  values with replacement from distribution, call it `tbs2`
  - (d) instantiate each of  $N$  agents with one value from `tbs2` and run simulation

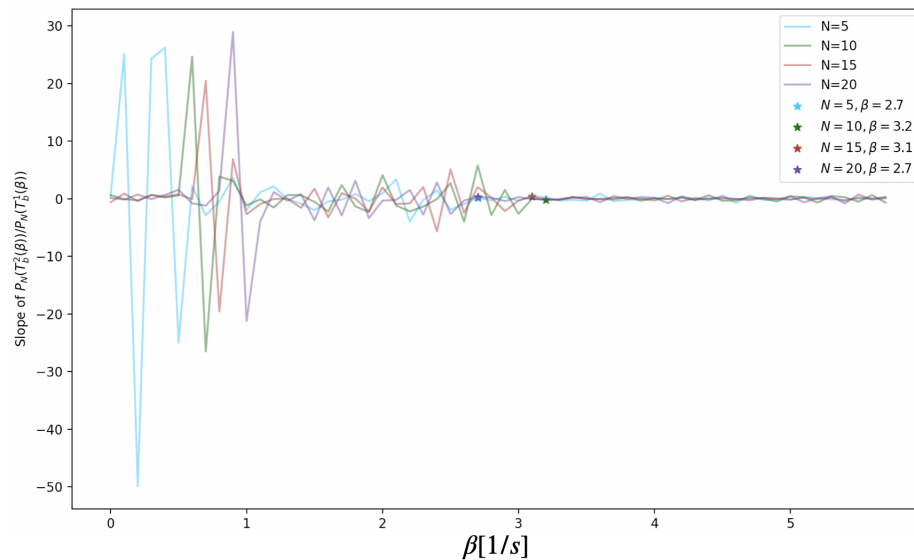

Figure 5: Slope of the relationship between  $T_{b2}$  and  $T_{b1}$  as a function of beta. The stable beta is found for each  $N$  by choosing the last value for which the absolute value of the slope exceeds 1.0.

### 8.3.2 Peak inter-burst intervals

The peak values of the inter-burst intervals are also shown here for additional clarity. Note that as  $N$  increases, the peak  $T_b^2$  is slowly decreasing. As  $N$  continues to increase to infinity, we expect to see this value trend downwards until reaching  $T_b^0$ , as discussed in Fig 1.C.  $T_b^1$  is defined as the value of  $T_b$  for which the probability density function is maximal at a given  $\beta$ , where the value of  $T_b < 0.5\max(T_b)$ .  $T_b^2$  is similarly defined as the value of  $T_b$  for which the probability density function is maximal at a given  $\beta$ , where the value of  $T_b > 0.5 * \max(T_b)$ . This splits the distribution into two pieces, the upper and lower regimes. We detect the peaks using the `scipy.signal.find_peaks` algorithm with a height =  $y_\epsilon = 0.01$ , a prominence or y-delta of 0.005, and an x-distance of 50. If the probability is less than  $y_\epsilon$ , we exclude the peak and replace its height with  $y_\epsilon$ .

### 8.3.3 Simulation parameters

All experiments carried out with this agent-based model were conducted via simulation. Code for the simulations and the data processing was written in Python and can be found at [this link](#). The simulation outputs a time series of flashes and their positions. For each set of parameters, we ran simulations for one hundred trials of 30,000 timesteps each. Parameters can be varied run-by-run via command-line arguments, which made a grid search parameter sweep over coupling strength  $\beta$  and number of fireflies  $N$  easily parallelizable. All other values required for the synchronization dynamics are instantiated from experimental observations as explained in the main text.
